# Supplementary material for: Antivirulence Properties of a Low-Molecular-Weight Quaternized Chitosan Derivative against Pseudomonas aeruginosa
Source: MDPI journal article supplement (doi:10.3390/microorganisms9050912), 2021-04-24
Supplement: s1 [file s1]

## Supplementary materials

### **Anti-virulence properties of a low-molecular quaternized chitosan derivative against *Pseudomonas aeruginosa***

Giuseppantonio Maisetta <sup>1\*</sup>, Anna Maria Piras<sup>2</sup>, Vincenzo Motta<sup>1</sup>, Simona Braccini<sup>3</sup>, Diletta Mazzantini<sup>1</sup>, Federica Chiellini<sup>3</sup>, Ylenia Zambito<sup>2,4</sup>, Semih Esin<sup>1</sup>, and Giovanna Batoni<sup>1</sup>

**Table S1:** Primers used in the study

| Oligo Name | Sequence (5'-3')    | Reference |
|------------|---------------------|-----------|
| LasI_For   | CGCACATCTGGGAACTCA  | [30]      |
| LasI_Rev   | CGGCACGGATCATCATCT  |           |
| RhlI_For   | GTAGCGGGTTTGCGGATG  | [30]      |
| RhlI_Rev   | CGGCATCAGGTCTTCATCG |           |
| RpoD_For   | CGAACTGCTTGCCGACTT  | [30]      |
| RpoD_Rev   | GCGAGAGCCTCAAGGAATC |           |

**Table S2:** Amplification conditions

| RhII      |      | LasI      |      |
|-----------|------|-----------|------|
| 95 °C 2'  |      | 95 °C 2'  |      |
| 95°C 15"  | x 40 | 95°C 15"  | x 40 |
| 58 °C 30" |      | 56 °C 30" |      |
| 72 °C 5"  |      | 72 °C 5"  |      |

**Table S3.** MIC values of QAL towards *P. aeruginosa* strains in TSB 20%

| Strain                          | Abbreviation | QAL<br>(mg/ml) | tob<br>(µg/ml) |
|---------------------------------|--------------|----------------|----------------|
| <i>P. aeruginosa</i> ATCC 27853 | Pa ATCC      | 0.62           | 1              |
| <i>P. aeruginosa</i> W4         | Pa W4        | 0.62           | 1              |
| <i>P. aeruginosa</i> CVC02118   | Pa C2118     | 0.31           | 1              |
| <i>P. aeruginosa</i> BAL0910    | Pa B910      | 0.62           | 1              |

tob: tobramicyn

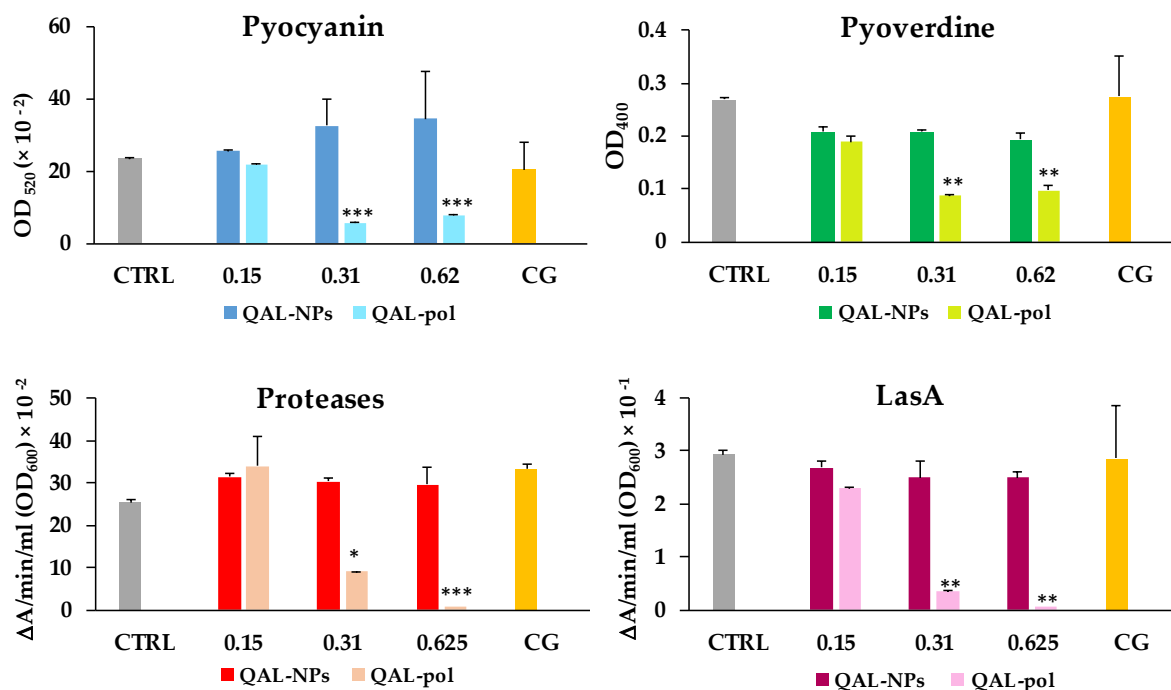

**Figure S1:** QAL-NPs were assayed for their anti-virulence activity against the Pa W4 strain. To this aim the strain was incubated at 37°C for 48 h in static conditions with concentrations of QAL-NP corresponding to 0.155, 0.31 and 0.62 mg/mL of QAL. CTRL: bacteria without treatment. CG: carrageenan was tested at the concentration of 0.1 mg/mL corresponding to the concentration of CG present in QAL-NPs equivalent at 0.62 mg/mL of QAL. Results are expressed as the means and error standard of the mean from three independent experiments. (\*p<0.05; \*\*p<0.01; \*\*\*p<0.001).
